# Supplementary material for: Impact of liver fibrosis score on prognosis after common therapies for intrahepatic cholangiocarcinoma: a propensity score matching analysis
Source: Springer Nature journal article supplement (doi:10.1186/s12885-020-07051-5), 2020-06-15

A: Kaplan-meier curve in chemotherapy patients

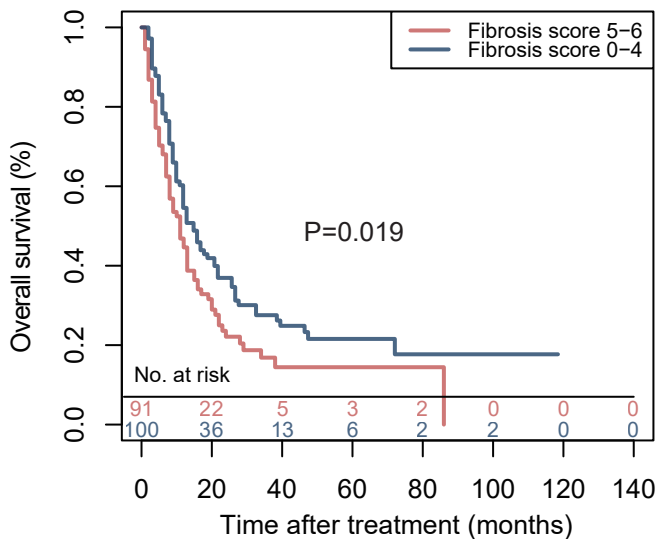

B: Kaplan-meier curve in non-chemotherapy patients

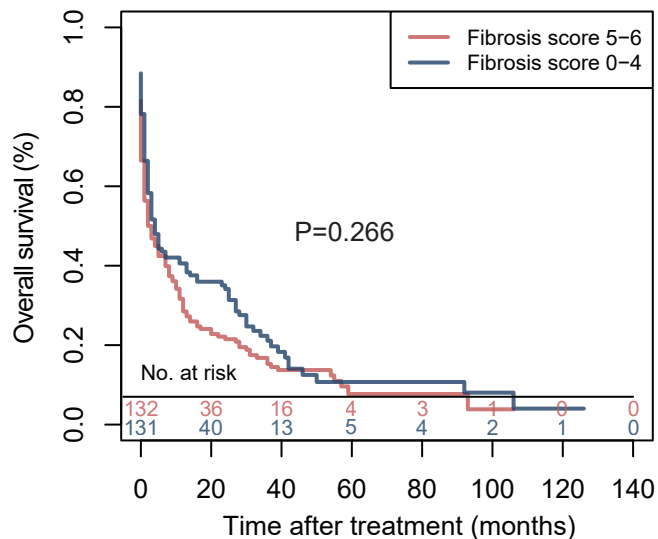

C: Kaplan-meier curve in radiotherapy patients

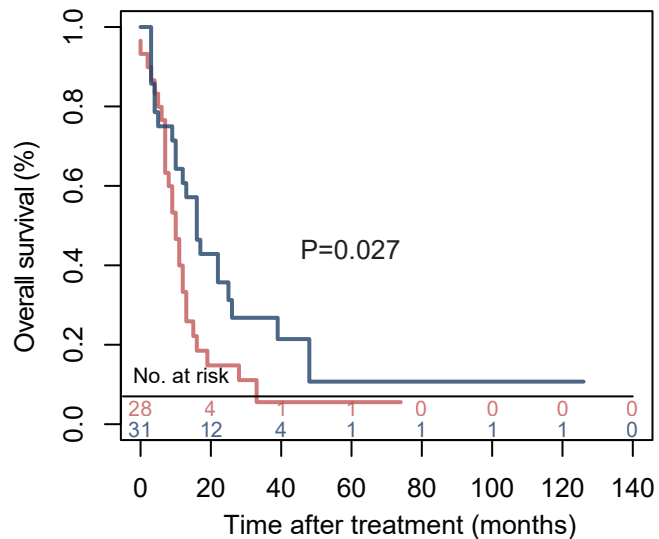

D: Kaplan-meier curve in non-radiotherapy Patients

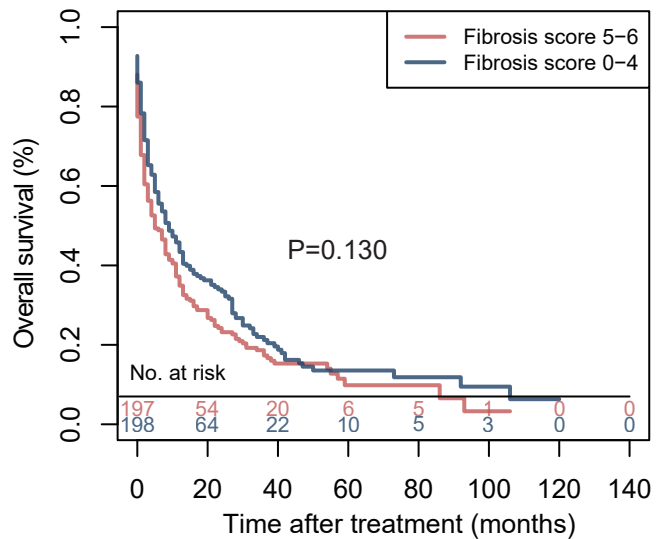

Supplement: MOESM2 [file 18084376]
