# Supplementary material for: Impact of liver fibrosis score on prognosis after common therapies for intrahepatic cholangiocarcinoma: a propensity score matching analysis
Source: Springer Nature journal article supplement (doi:10.1186/s12885-020-07051-5), 2020-06-15

A

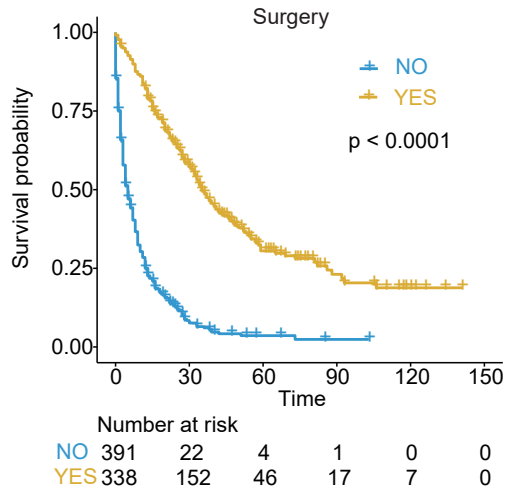

B

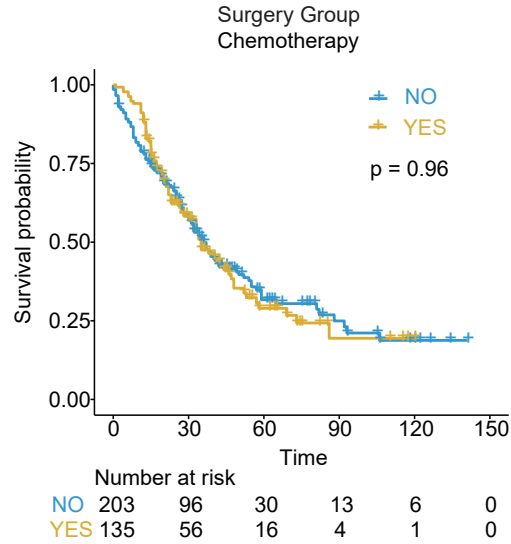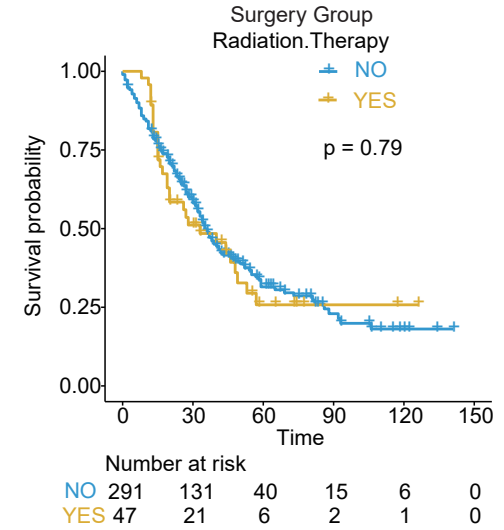

C

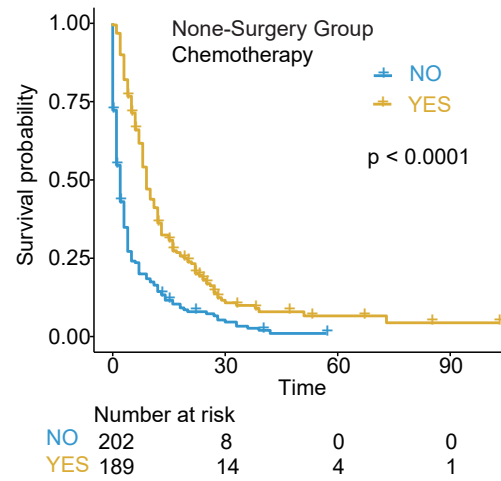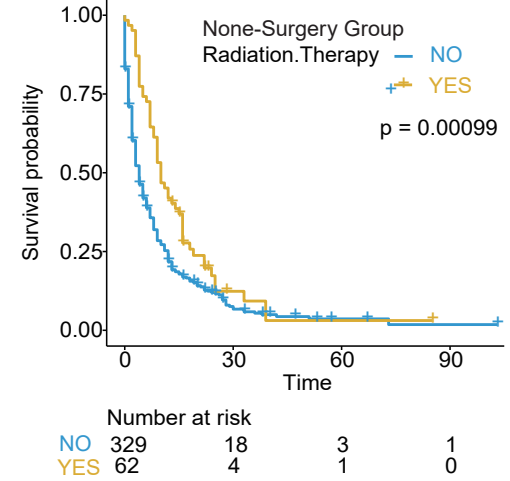

Supplement: MOESM3 [file 18084376]
